# Supplementary material for: Mapping the Physiological Response of Oenococcus oeni to Ethanol Stress Using an Extended Genome-Scale Metabolic Model
Source: Front Microbiol. 2018 Mar 1;9:291. doi: 10.3389/fmicb.2018.00291 (PMC5838312; doi:10.3389/fmicb.2018.00291)
Supplement: Supplementary file 7 [file Data_Sheet_2.xls]

## Sheet: Resumen
Sensitivity analisis of NGAM estimation with respect to the fixed specific consumption/production rates of compounds during growth of O.oeni PSU-1 at different ethanol concentrations in maxOeno medium
			_S__malate_ex_	lactate(R_or_D)_ex_	citrate_ex_	acetate_ex_	a_D_glucose_ex_	b_D_fructose_ex_	D_mannitol_ex_	erythritol_ex_	L_Cys_ex_	L_Ser_ex_	L_Thr_ex_	L_Phe_ex_	L_Val_ex_	ethanol_ex_	_S__lactate_ex_	min	max
Ethanol 0%	phase 1	0.01	0.115	0.097	0.09	0.108	0.132	0.153	0.015	0.078	0.097	0.097	0.097	0.063	0.063	0.09	0.094	0.015	0.153
		-0.01	0.079	0.098	0.104	0.086	0.062	0.041	0.179	0.116	0.097	0.097	0.097	0.063	0.063	0.105	0.1	0.041	0.179
	phase 2	0.01	0.157	0.158	0.157	0.162	0.167	0.162	0.143	0.148	0.157	0.157	0.157	0.157	0.182	0.157	0.158	0.143	0.182
		-0.01	0.157	0.157	0.157	0.152	0.148	0.152	0.172	0.167	0.157	0.157	0.157	0.157	0.182	0.157	0.157	0.148	0.182
	phase 3	0.01	0.328	0.328	0.328	0.329	0.338	0.329	0.325	0.32	0.328	0.328	0.328	0.271	0.328	0.325	0.328	0.271	0.338
		-0.01	0.328	0.329	0.328	0.328	0.318	0.328	0.331	0.337	0.328	0.328	0.328	0.271	0.328	0.332	0.328	0.271	0.337
Ethanol 3%	phase 1	0.01	0.329	0.307	0.301	0.319	0.341	0.364	0.21	0.286	0.308	0.308	0.308	0.301	0.301		0.304	0.21	0.364
		-0.01	0.286	0.308	0.314	0.296	0.274	0.251	0.406	0.33	0.308	0.308	0.307	0.301	0.301		0.311	0.251	0.406
	phase 2	0.01	0.961	0.963	0.961	0.971	0.977	0.974	0.936	0.943	0.961	0.961	0.961	1.044	1.044		0.961	0.936	1.044
		-0.01	0.961	0.96	0.961	0.951	0.945	0.948	0.986	0.979	0.961	0.961	0.961	1.044	1.044		0.961	0.945	1.044
	phase 3	0.01	0.983	0.985	0.983	0.985	0.996	0.987	0.983	0.968	0.983	0.983	0.983	1.297	1.297		0.983	0.968	1.297
		-0.01	0.983	0.982	0.983	0.982	0.97	0.98	0.983	0.998	0.983	0.983	0.983	1.297	1.297		0.983	0.97	1.297
Ethanol 6%	phase 1	0.01	0.269	0.245	0.238	0.254	0.284	0.29	0.159	0.221	0.245	0.245	0.245	0.51	0.51		0.241	0.159	0.51
		-0.01	0.221	0.245	0.253	0.236	0.206	0.2	0.331	0.269	0.245	0.245	0.245	0.51	0.51		0.249	0.2	0.51
	phase 2	0.01	0.579	0.58	0.579	0.583	0.584	0.588	0.568	0.573	0.579	0.579	0.579	1.253	1.253		0.579	0.568	1.253
		-0.01	0.579	0.578	0.579	0.575	0.574	0.57	0.59	0.585	0.579	0.579	0.579	1.253	1.253		0.579	0.57	1.253
	phase 3	0.01	0.705	0.705	0.705	0.707	0.711	0.707	0.693	0.698	0.705	0.705	0.705	1.322	1.322		0.705	0.693	1.322
		-0.01	0.705	0.704	0.705	0.702	0.698	0.702	0.716	0.711	0.705	0.704	0.705	1.322	1.322		0.705	0.698	1.322
Ethanol 9%	phase 1	0.01	0.963	0.936	0.931	0.946	0.973	1.003	0.825	0.91	0.937	0.937	0.937	1.052	1.052		0.932	0.825	1.052
		-0.01	0.91	0.937	0.942	0.927	0.9	0.87	1.048	0.962	0.936	0.936	0.936	1.052	1.052		0.94	0.87	1.052
	phase 2	0.01	1.333	1.334	1.333	1.336	1.335	1.341	1.329	1.327	1.333	1.333	1.333	2.222	2.222		1.334	1.327	2.222
		-0.01	1.333	1.332	1.333	1.329	1.331	1.324	1.337	1.338	1.332	1.333	1.333	2.222	2.222		1.332	1.324	2.222
	phase 3	0.01	1.888	1.888	1.888	1.892	1.894	1.892	1.869	1.884	1.888	1.888	1.888	2.782	2.782		1.889	1.869	2.782
		-0.01	1.888	1.887	1.888	1.883	1.881	1.883	1.907	1.891	1.888	1.888	1.888	2.782	2.782		1.886	1.881	2.782
Ethanol 12%	phase 1	0.01	1.683	1.655	1.647	1.665	1.691	1.714	1.562	1.631	1.656	1.656	1.656	1.741	1.741		1.651	1.562	1.741
		-0.01	1.628	1.656	1.664	1.646	1.62	1.596	1.749	1.679	1.655	1.655	1.655	1.741	1.741		1.66	1.596	1.749
	phase 2	0.01	1.271	1.271	1.271	1.279	1.27	1.26	1.271	1.27	1.271	1.271	1.271	2.492	2.492		1.272	1.26	2.492
		-0.01	1.271	1.271	1.271	1.263	1.272	1.282	1.271	1.272	1.271	1.271	1.271	2.492	2.492		1.27	1.263	2.492
	phase 3	0.01	1.292	1.292	1.292	1.318	infeasible	infeasible	1.32	1.293	1.292	1.292	1.292	3.114	3.114		1.292	1.292	3.114
		-0.01	1.292	1.292	1.292	infeasible	1.316	1.336	infeasible	1.29	1.292	1.292	1.292	3.114	3.114		1.292	1.29	3.114
